# Supplementary material for: Elevated circulating FABP4 concentration predicts cardiovascular death in a general population: a 12-year prospective study
Source: PubMed Central journal article supplement (PMC7889640; doi:10.1038/s41598-021-83494-5), 2021-02-17
Supplement: 41598_2021_83494_MOESM1_ESM.pdf [file 41598_2021_83494_MOESM1_ESM.pdf]

***Supplementary materials***

**Elevated circulating FABP4 concentration predicts cardiovascular death in a general population: A 12-year prospective study.**

Norie Saito, Masato Furuhashi, Masayuki Koyama, Yukimura Higashiura, Hiroshi Akasaka, Marenao Tanaka, Norihito Moniwa, Hirofumi Ohnishi, Shigeyuki Saitoh, Nobuyuki Ura, Kazuaki Shimamoto, Tetsuji Miura.

Figure S1

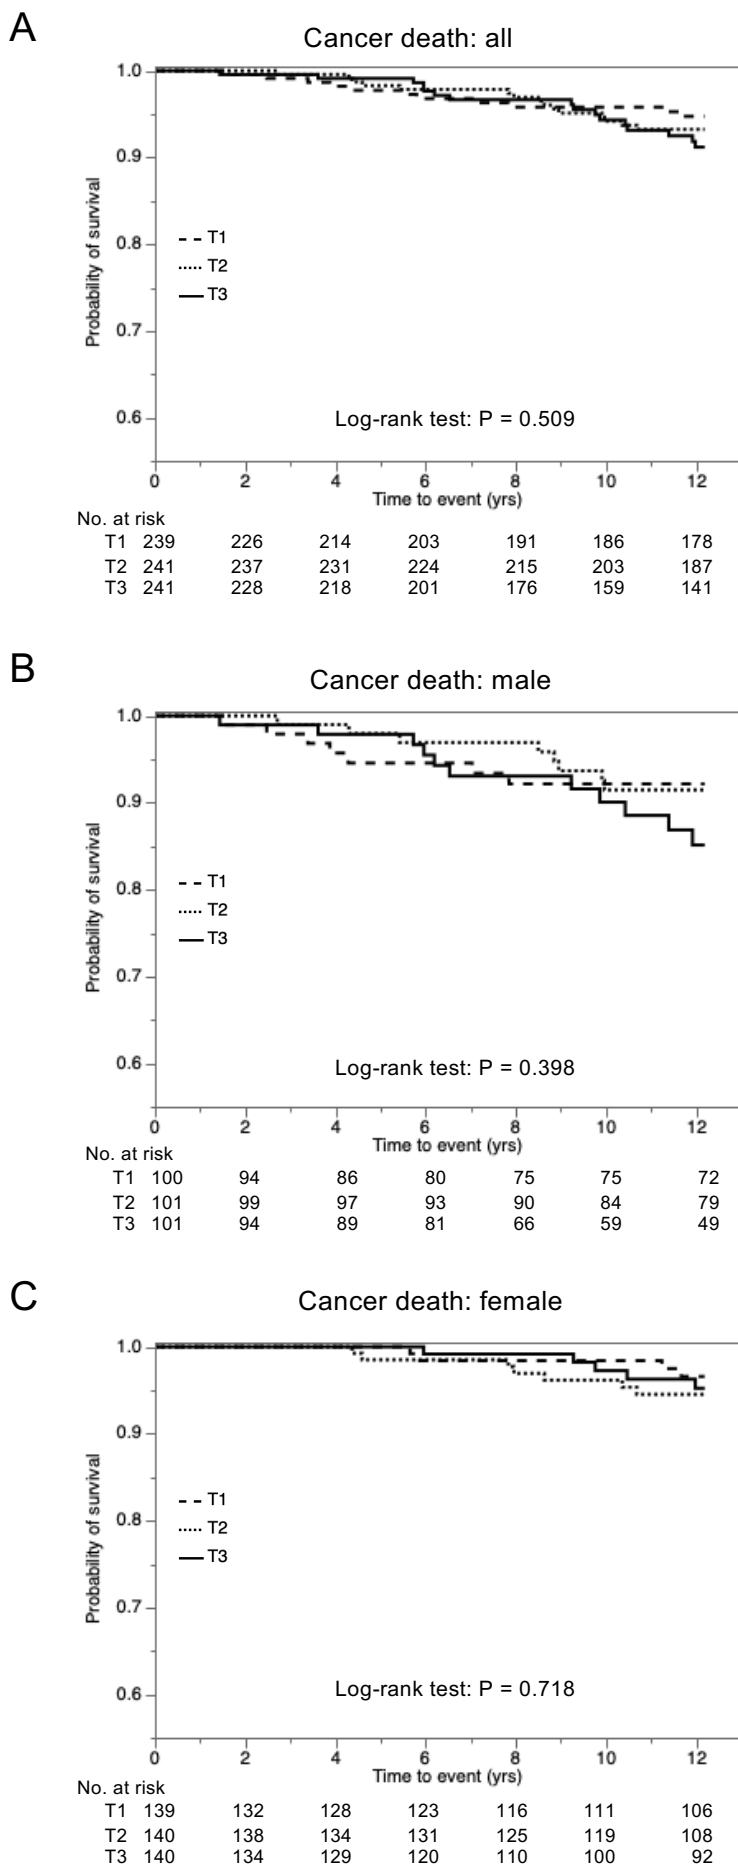

**Figure S1. Survival curves of subgroups divided by tertiles of FABP4 level at baseline.** A-C. Kaplan-Meier survival curves for cancer death in the three groups (T1~T3) according to tertiles of fatty acid-binding protein 4 (FABP4) concentration at baseline in all of the subjects (A) and in male (B) and female (C) subjects. Dashed line (T1), dotted line (T2) and solid line (T3). Survival rate was compared by log-rank test.

Figure S2

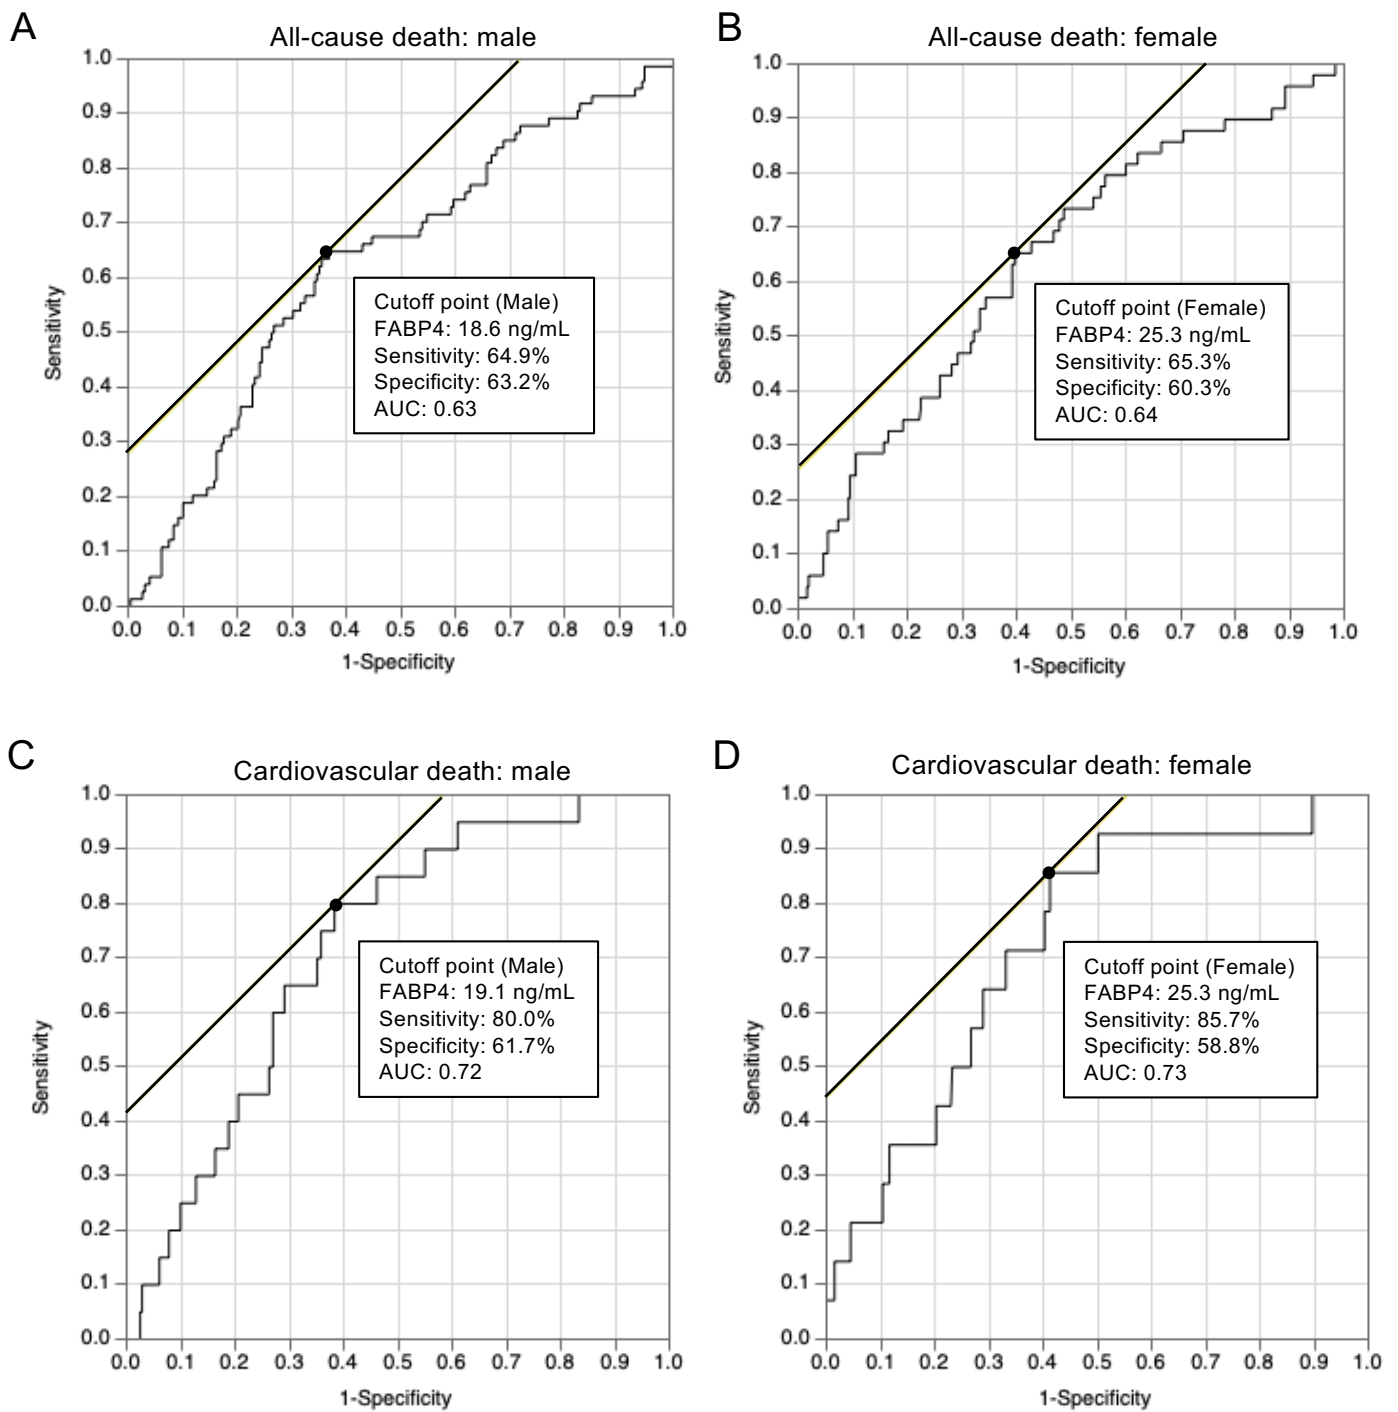

**Figure S2. Prediction of mortality by FABP4 level at baseline.**

**A, B.** Receiver operating characteristic (ROC) curves of fatty acid-binding protein 4 (FABP4) concentration at baseline to predict all-cause death in male (A) and female (B) subjects. **C, D.** ROC curves of FABP4 concentration at baseline to predict cardiovascular death in male (C) and female (D) subjects. For a given FABP4 level, the ordinate value shows the percentage of patients with that FABP4 level who died (true-positive rate or sensitivity), and the abscissa value shows the percentage of patients with that FABP4 level who did not die (false-positive rate or 1-specificity). AUC, area under curve.

Table S1

Table S1. Basal characteristics of the subjects (n = 721)

|                                   | Total<br>n = 721 | Male<br>n = 302  | Female<br>n = 419 | P       |
|-----------------------------------|------------------|------------------|-------------------|---------|
| Age (years)                       | 64 ± 14          | 65 ± 14          | 64 ± 14           | 0.324   |
| Body mass index                   | 24.0 ± 3.9       | 24.4 ± 3.9       | 23.7 ± 3.9        | 0.021   |
| Waist circumference (cm)          | 85.3 ± 10.2      | 85.3 ± 9.3       | 85.3 ± 10.9       | 0.999   |
| Systolic blood pressure (mmHg)    | 138 ± 24         | 140 ± 22         | 137 ± 26          | 0.090   |
| Diastolic blood pressure (mmHg)   | 78 ± 12          | 80 ± 11          | 77 ± 13           | 0.002   |
| Pulse rate (beats/min)            | 69 ± 11          | 66 ± 9           | 71 ± 11           | 0.001   |
| Smoking habit                     | 130 (18.0)       | 89 (29.5)        | 41 (9.8)          | < 0.001 |
| Alcohol drinking habit            | 312 (43.3)       | 191 (63.2)       | 121 (28.9)        | < 0.001 |
| Comorbidity                       |                  |                  |                   |         |
| Hypertension                      | 391 (54.2)       | 168 (55.6)       | 223 (53.2)        | 0.552   |
| Diabetes mellitus                 | 73 (10.1)        | 47 (15.6)        | 26 (6.2)          | < 0.001 |
| Dyslipidemia                      | 336 (46.6)       | 144 (47.7)       | 192 (45.8)        | 0.622   |
| Biochemical data                  |                  |                  |                   |         |
| AST (IU/L)                        | 23 (20-29)       | 25 (20-30)       | 22 (19-27)        | < 0.001 |
| ALT (IU/L)                        | 20 (15-27)       | 23 (17-31)       | 18 (14-24)        | < 0.001 |
| γGTP (IU/L)                       | 21 (15-34)       | 30 (20-45)       | 18 (14-26)        | < 0.001 |
| Blood urea nitrogen (mg/dL)       | 16 ± 5           | 17 ± 5           | 15 ± 4            | < 0.001 |
| Creatinine (mg/dL)                | 0.7 ± 0.3        | 0.8 ± 0.2        | 0.6 ± 0.4         | < 0.001 |
| eGFR (ml/min/1.73m <sup>2</sup> ) | 82.2 ± 19.2      | 80.9 ± 18.6      | 83.1 ± 19.6       | 0.129   |
| Uric acid (mg/dL)                 | 5.2 ± 1.3        | 6.0 ± 1.2        | 4.7 ± 1.1         | < 0.001 |
| Total cholesterol (mg/dL)         | 203 ± 34         | 197 ± 35         | 208 ± 33          | < 0.001 |
| LDL cholesterol (mg/dL)           | 122 ± 32         | 120 ± 33         | 124 ± 31          | 0.137   |
| HDL cholesterol (mg/dL)           | 60 ± 16          | 55 ± 14          | 64 ± 16           | < 0.001 |
| Triglycerides (mg/dL)             | 91 (67-123)      | 98 (72-134)      | 86 (64-113)       | < 0.001 |
| Fasting glucose (mg/dL)           | 100 ± 21         | 104 ± 24         | 97 ± 19           | < 0.001 |
| Insulin (μU/ml)                   | 4.7 (3.4-7.2)    | 4.7 (3.3-7.8)    | 4.8 (3.4-6.8)     | 0.760   |
| HOMA-R                            | 1.11 (0.79-1.83) | 1.14 (0.78-1.94) | 1.10 (0.79-1.76)  | 0.390   |
| Hemoglobin A1c (%)                | 5.2 ± 0.6        | 5.3 ± 0.6        | 5.1 ± 0.6         | 0.001   |
| BNP (pg/mL)                       | 18 (11-33)       | 16 (9-32)        | 19 (12-34)        | 0.020   |
| hsCRP (mg/dL)                     | 0.04 (0.02-0.09) | 0.05 (0.03-0.10) | 0.04 (0.02-0.08)  | < 0.001 |
| FABP4 (ng/mL)                     | 20.8 (14.5-27.6) | 16.9 (12.5-22.9) | 23.3 (16.7-30.4)  | < 0.001 |

Variables are expressed as number (%), means ± SD or medians (interquartile ranges).

AST, Aspartate transaminase; ALT, Alanine transaminase; BNP, brain natriuretic peptide; eGFR, estimated glomerular filtration rate; FABP4, fatty acid-binding protein 4; γGTP, γ-glutamyl transpeptidase; HDL, high-density lipoprotein; HOMA-R, homeostasis model assessment of insulin resistance; hsCRP, high-sensitivity C-reactive protein; LDL, low-density lipoprotein.

## Table S2

Table S2. Basal characteristics of the male subjects with tertiles of FABP4 level at baseline (n = 302)

| Tertiles of FABP4 level                 | T1       | T2        | T3         | P     |
|-----------------------------------------|----------|-----------|------------|-------|
| n                                       | 100      | 101       | 101        |       |
| FABP4 level (ng/mL), range              | 5.3-14.2 | 14.2-21.0 | 21.2-50.6  |       |
| Medication                              |          |           |            |       |
| Angiotensin II receptor blocker         | 7 (7.0)  | 5 (5.0)   | 10 (19.9)  | 3.965 |
| Angiotensin-converting enzyme inhibitor | 2 (2.0)  | 1 (1.0)   | 1 (1.0)    | 0.770 |
| Calcium channel blocker                 | 5 (5.0)  | 12 (11.9) | 19 (18.8)* | 0.010 |
| β blocker                               | 3 (3.0)  | 1 (1.0)   | 4 (4.0)    | 0.407 |
| α blocker                               | 1 (1.0)  | 0 (0.0)   | 3 (3.0)    | 0.171 |
| Diuretic                                | 1 (1.0)  | 0 (0.0)   | 3 (3.0)    | 0.171 |
| Sulfonylurea                            | 4 (4.0)  | 3 (3.0)   | 9 (8.9)    | 0.132 |
| Biguanide                               | 3 (3.0)  | 1 (1.0)   | 3 (3.0)    | 0.554 |
| Thiazolidinedione                       | 0 (0.0)  | 0 (0.0)   | 3 (3.0)*   | 0.049 |
| α glucosidase inhibitor                 | 4 (4.0)  | 1 (1.0)   | 5 (5.0)    | 0.260 |
| Insulin                                 | 0 (0.0)  | 2 (2.0)   | 0 (0.0)    | 0.135 |
| Statin                                  | 3 (3.0)  | 5 (5.0)   | 9 (8.9)    | 0.179 |
| Fibrate                                 | 1 (1.0)  | 3 (3.0)   | 1 (1.0)    | 0.447 |
| Eicosapentaenoic acid                   | 2 (2.0)  | 1 (1.0)   | 4 (4.0)    | 0.362 |
| Anti-platelet drugs                     | 8 (8.0)  | 5 (5.0)   | 13 (12.9)  | 0.129 |
| Warfarin                                | 2 (2.0)  | 4 (4.0)   | 3 (3.0)    | 0.716 |

Variables are expressed as number (%), means ± SD or medians (interquartile ranges). \*P < 0.05 vs. T1. FABP4, fatty acid-binding protein 4.

# Table S3

Table S3. Basal characteristics of the female subjects with tertiles of FABP4 level at baseline (n = 419)

| Tertiles of FABP4 level                 | T1       | T2         | T3         | P     |
|-----------------------------------------|----------|------------|------------|-------|
| n                                       | 139      | 140        | 140        |       |
| FABP4 level (ng/mL), range              | 6.4-18.4 | 18.4-27.3  | 27.4-85.5  |       |
| Medication                              |          |            |            |       |
| Angiotensin II receptor blocker         | 4 (2.9)  | 13 (9.3)*  | 22 (15.7)* | 0.001 |
| Angiotensin-converting enzyme inhibitor | 2 (1.4)  | 2 (1.4)    | 3 (2.1)    | 0.867 |
| Calcium channel blocker                 | 13 (9.4) | 30 (21.4)* | 31 (22.1)* | 0.007 |
| β blocker                               | 0 (0.0)  | 3 (2.1)    | 6 (4.3)*   | 0.048 |
| α blocker                               | 0 (0.0)  | 1 (0.7)    | 0 (0.0)    | 0.368 |
| Diuretic                                | 2 (1.4)  | 1 (0.7)    | 8 (5.7)*   | 0.018 |
| Sulfonylurea                            | 1 (0.7)  | 5 (3.6)    | 5 (3.6)    | 0.228 |
| Biguanide                               | 0 (0.0)  | 3 (2.1)    | 3 (2.1)    | 0.221 |
| Thiazolidinedione                       | 0 (0.0)  | 0 (0.0)    | 0 (0.0)    | -     |
| α glucosidase inhibitor                 | 2 (1.4)  | 2 (1.4)    | 3 (2.1)    | 0.867 |
| Insulin                                 | 0 (0.0)  | 0 (0.0)    | 2 (1.4)    | 0.135 |
| Statin                                  | 8 (5.8)  | 11 (7.9)   | 22 (15.7)* | 0.013 |
| Fibrate                                 | 1 (0.7)  | 2 (1.4)    | 2 (1.4)    | 0.820 |
| Eicosapentaenoic acid                   | 1 (0.7)  | 9 (6.4)*   | 5 (3.6)    | 0.037 |
| Anti-platelet drugs                     | 2 (1.4)  | 11 (7.9)   | 9 (6.4)    | 0.042 |
| Warfarin                                | 0 (0.0)  | 0 (0.0)    | 0 (0.0)    | -     |

Variables are expressed as number (%), means ± SD or medians (interquartile ranges). \*P < 0.05 vs. T1. FABP4, fatty acid-binding protein 4.
